# Supplementary material for: All-gas-phase synthesis of amino-functionalized UiO-66 thin films
Source: Royal Society of Chemistry journal article supplement (doi:10.1039/c7dt03518g), 2017-01-01
Supplement: c7dt03518g1.pdf [file c7dt03518g1.pdf]

## Supplementary information

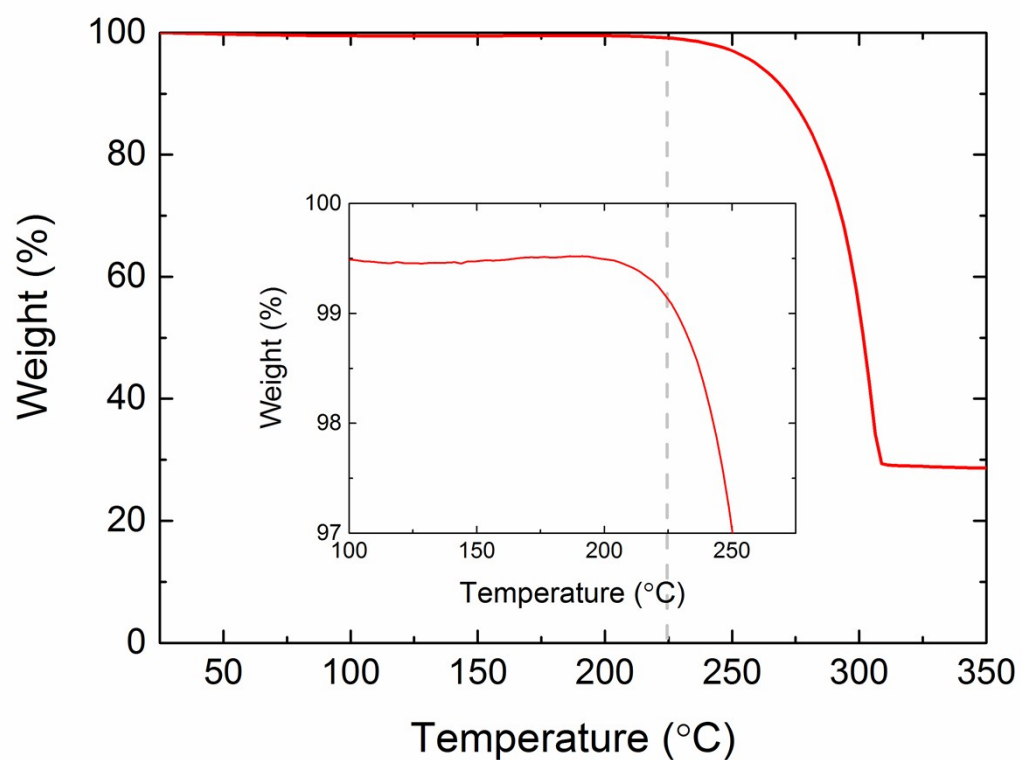

**Supplementary figure 1 | Thermogravimetric analysis.** Weight loss as a function of the sample temperature for 2-amino-1,4-BDC with a heating rate of 1 °C per minute. The inset shows a portion of the same graph expanded along the y-axis. The dashed grey line shows the chosen precursor temperature (225 °C).

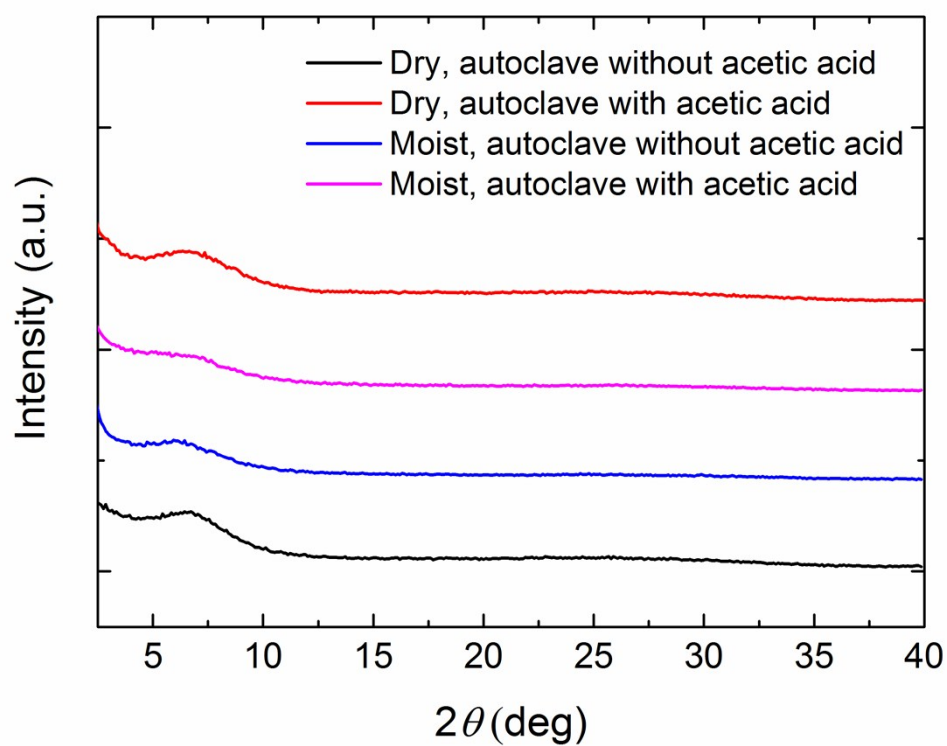

**Supplementary figure 2 | Samples deposited at 315 °C.** GIXRD diffractograms of four samples that were deposited with a reaction temperature of 315 °C that have been treated in an autoclave with (magenta, red) or without (black, blue) acetic acid after being exposed to dry (black, red) or moist (blue, magenta) air after the deposition.

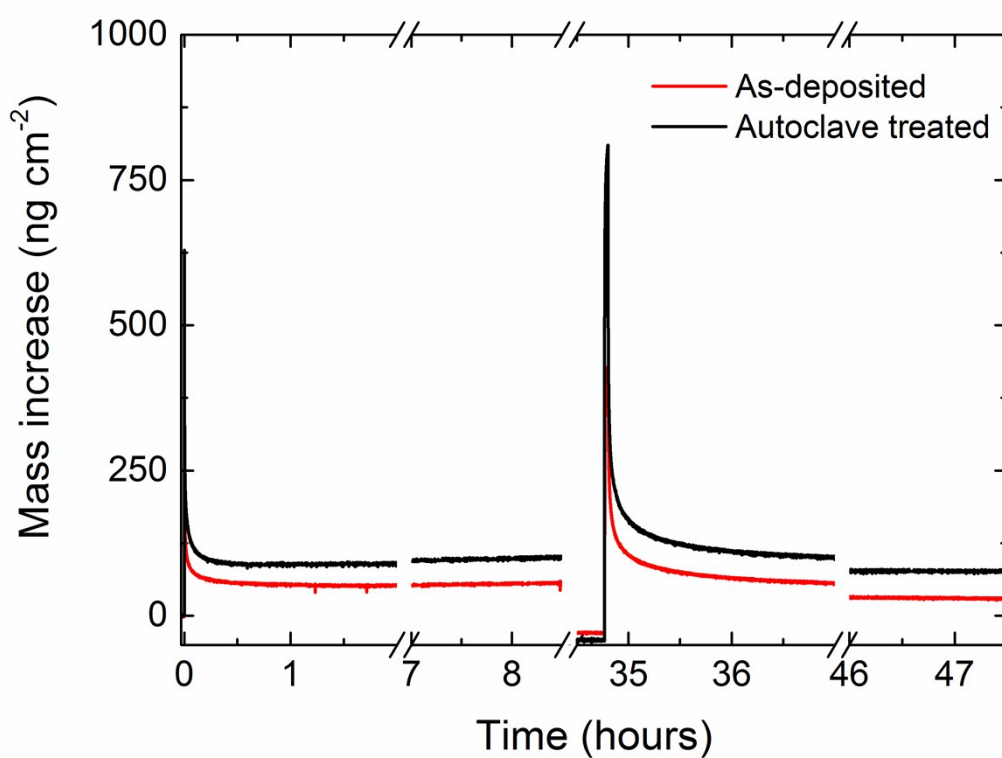

**Supplementary figure 3 | Porosity test.** A graph showing the mass increase and loss over time for the full porosity test of an As-deposited (black) and autoclave treated (red) sample. The experiment consists of a five-second water pulse followed by a nine-hour purge, a heating step (2 hours at 150 °C and 24-hour temperature stabilization, not shown), and a two-minute water pulse followed by a 12-hour purge.
